# Supplementary material
Source: PubMed Central journal article supplement (PMC1315405)

# Supplemental Figure 1 (Kiburz)

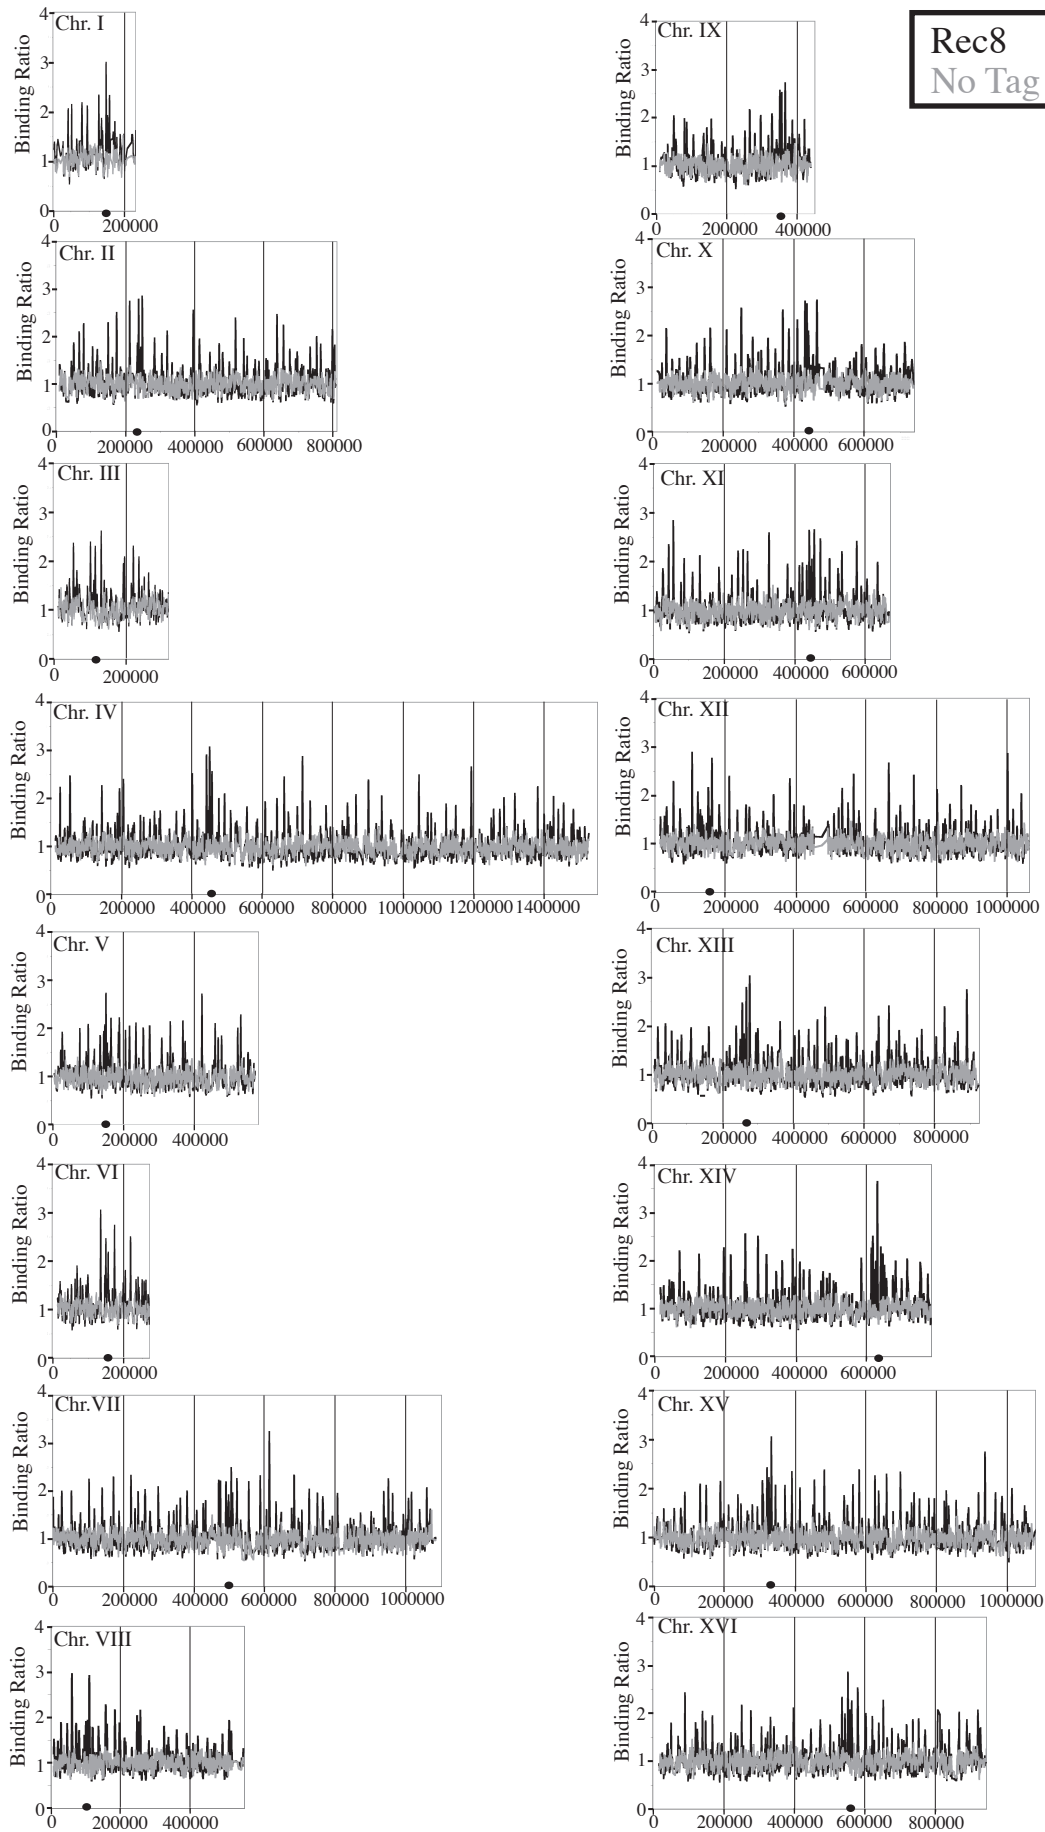

Supplement: genesdev_19_24_3017__1.pdf [file genesdev_19_24_3017__1.pdf]

# Supplemental Figure 2 (Kiburz)

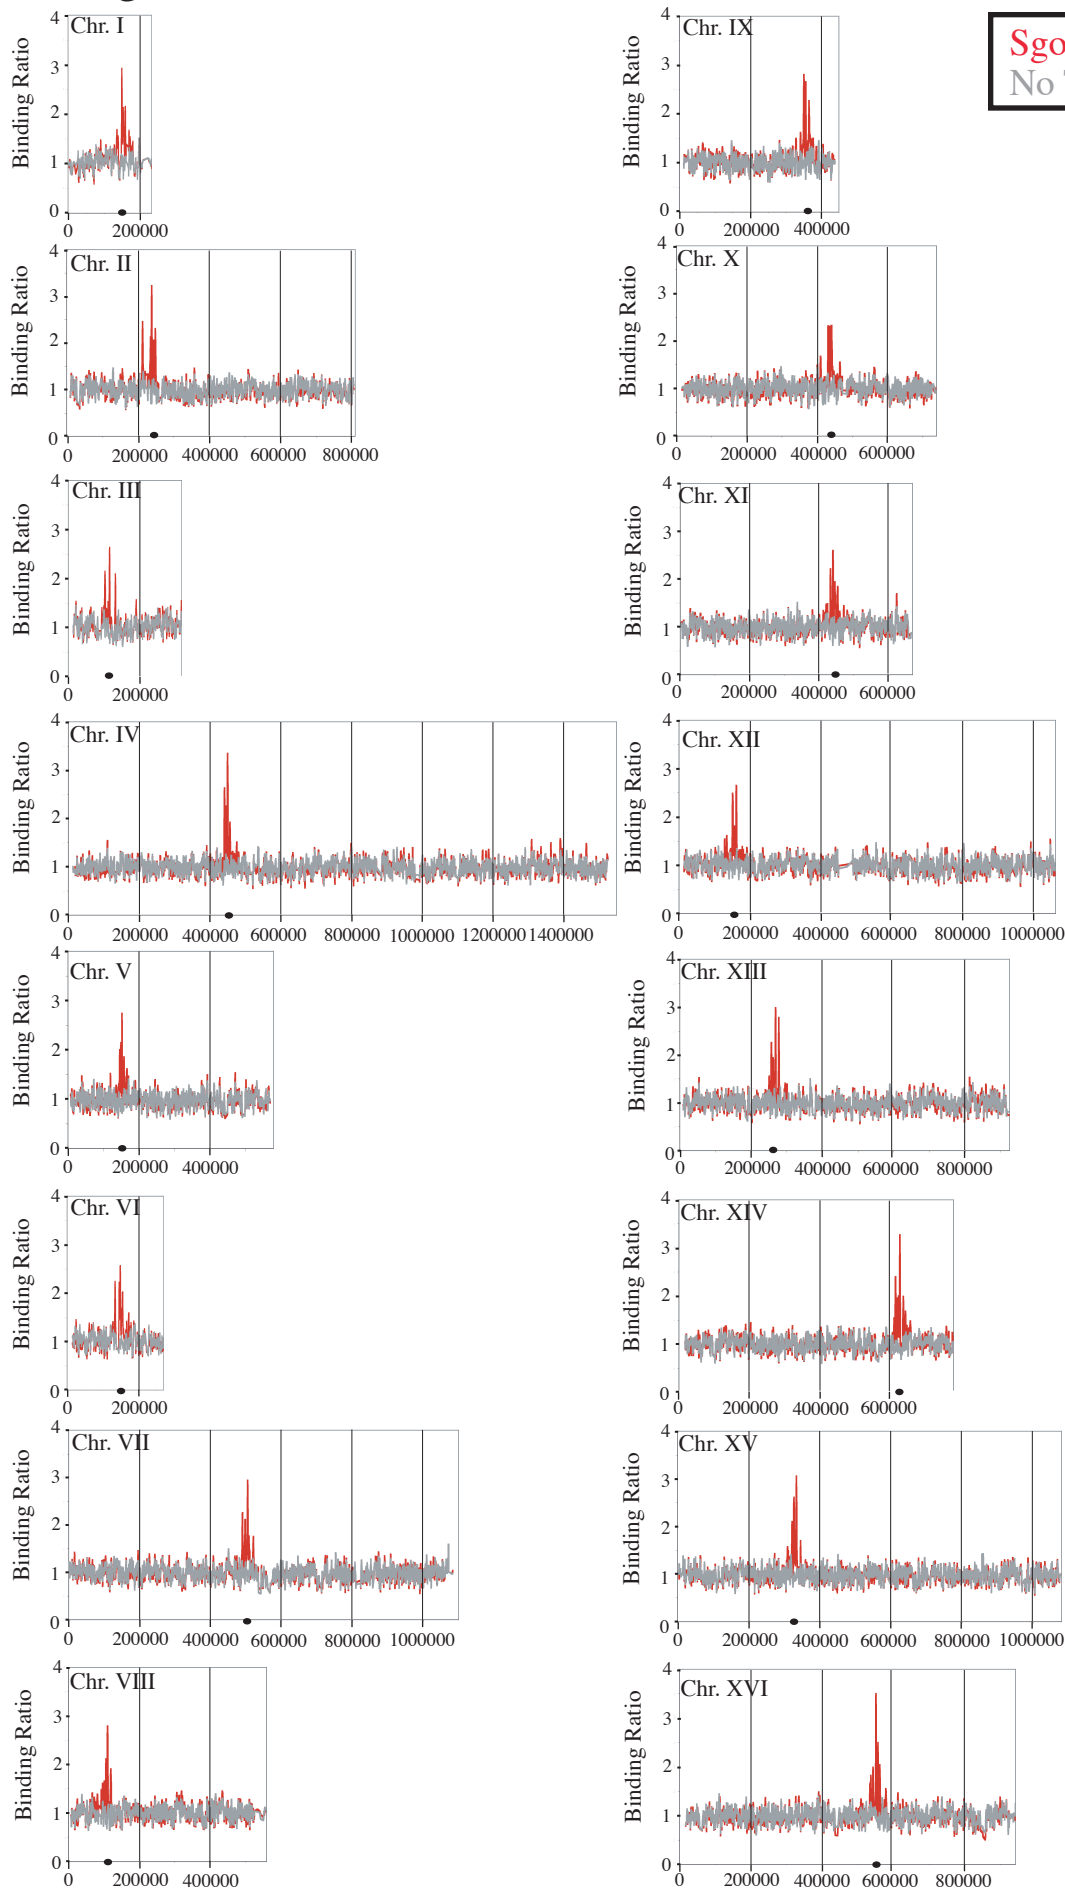

Sgo1  
No Tag

Supplement: genesdev_19_24_3017__2.pdf [file genesdev_19_24_3017__2.pdf]

# Supplemental Figure 3 (Kiburz)

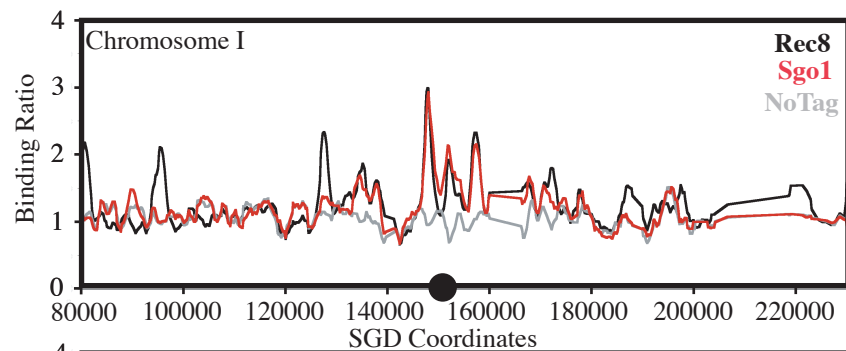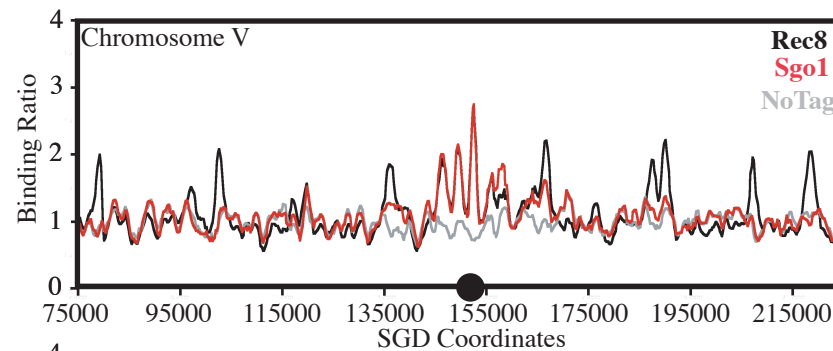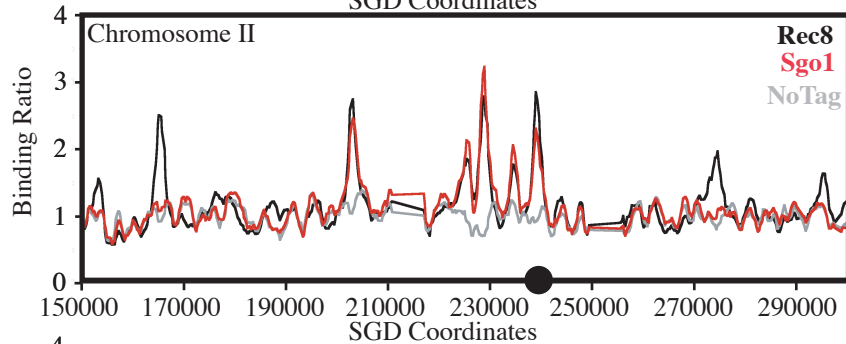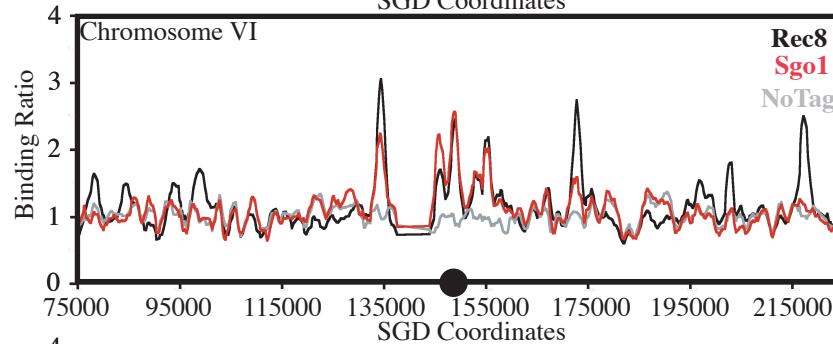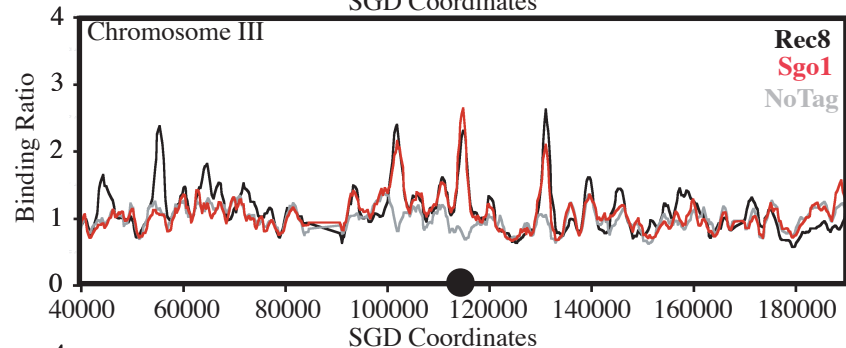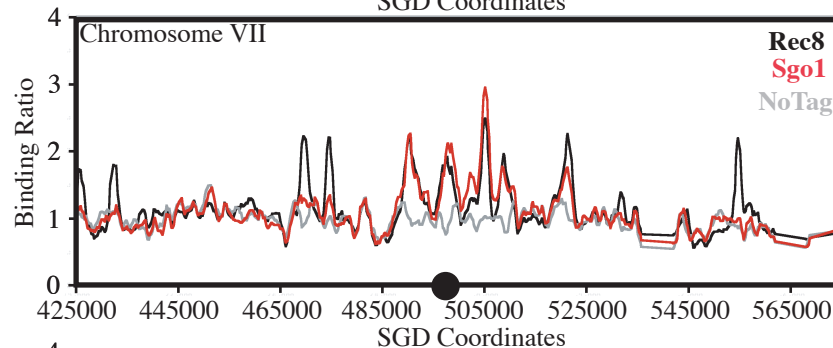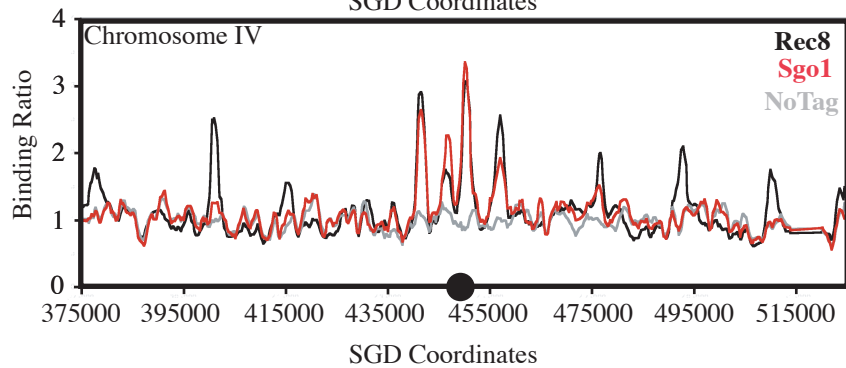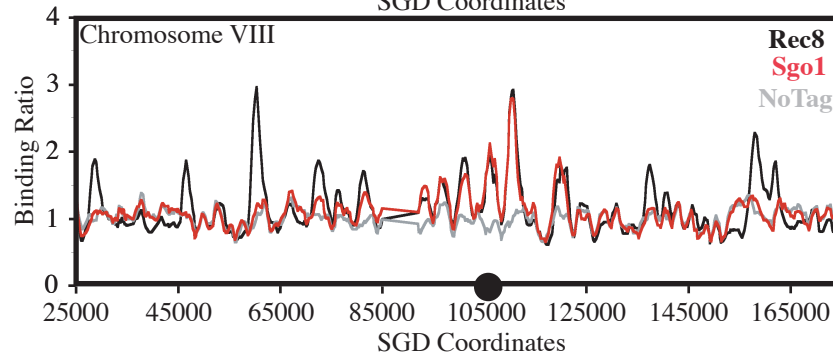

Supplement: genesdev_19_24_3017__3.pdf [file genesdev_19_24_3017__3.pdf]

# Supplemental Figure 4 (Kiburz)

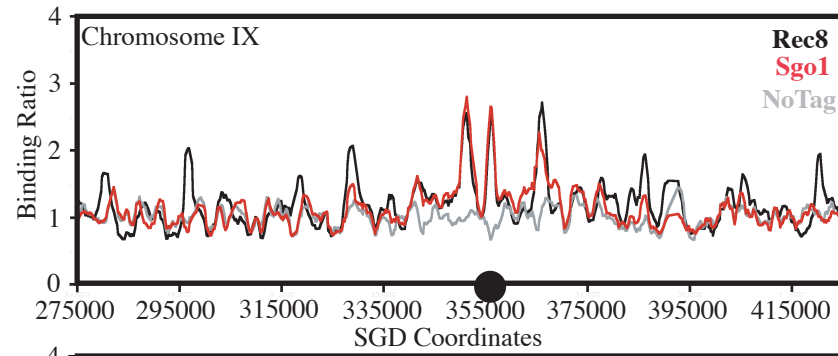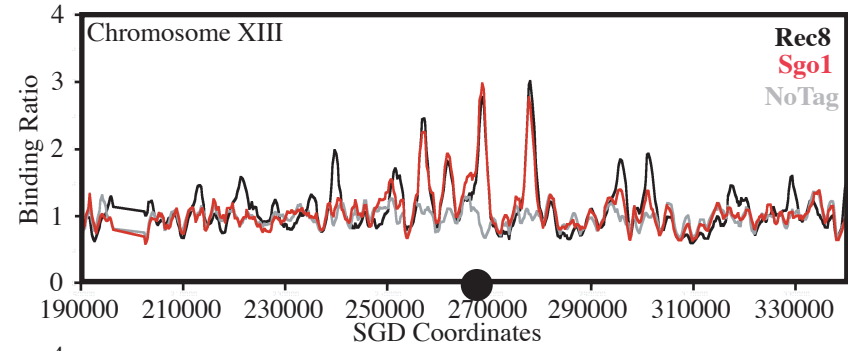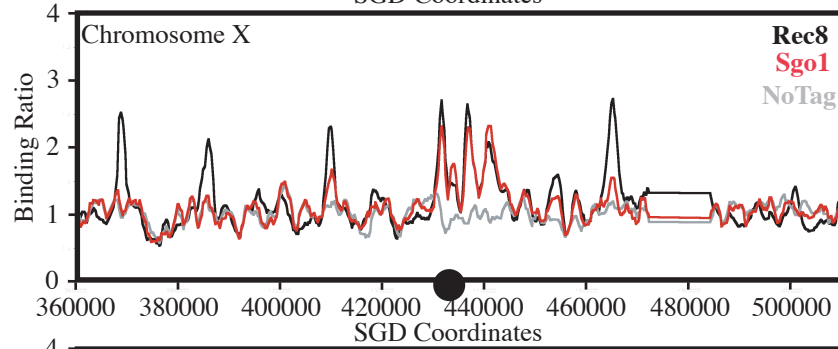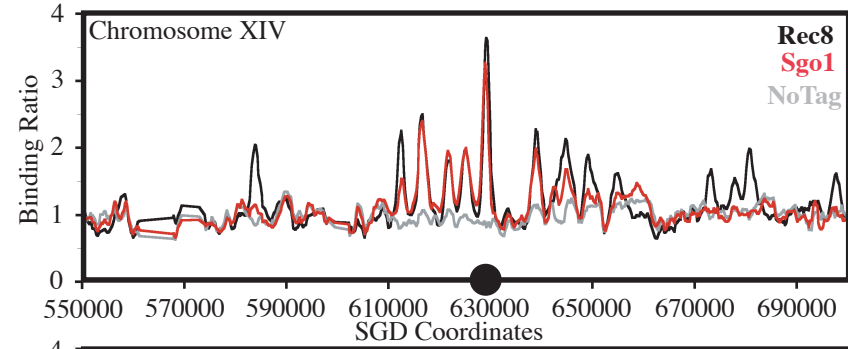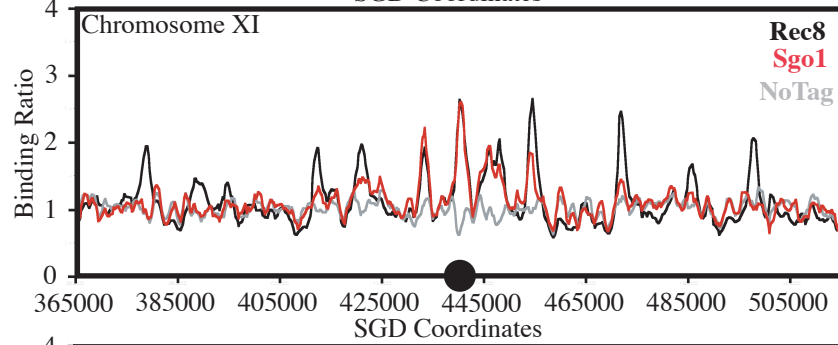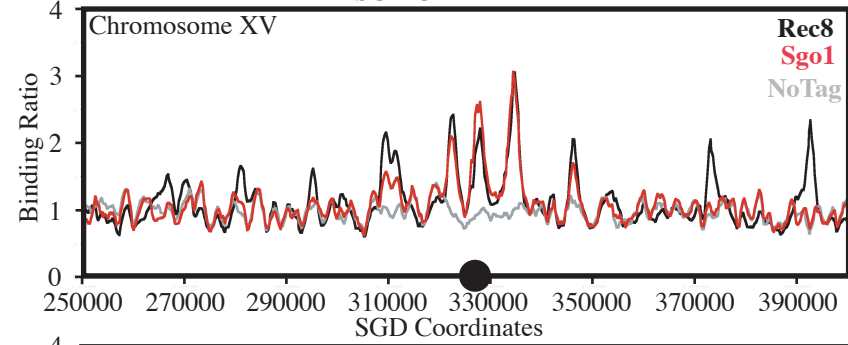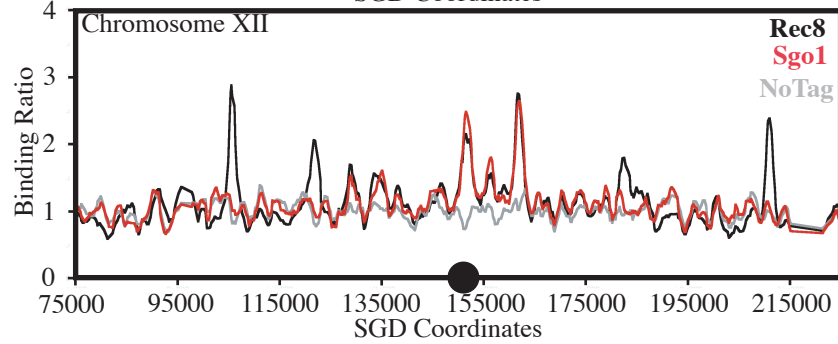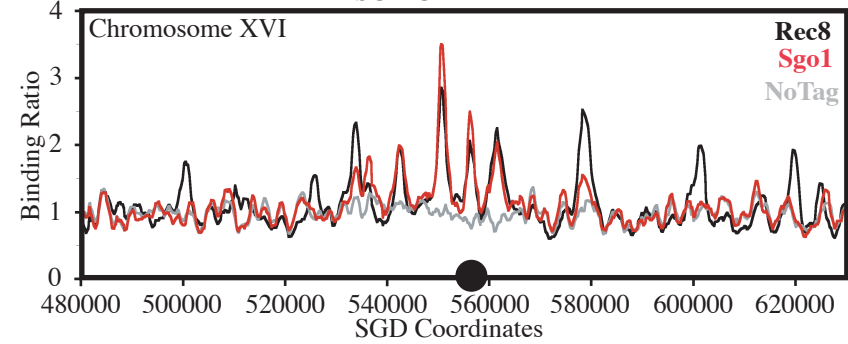

Supplement: genesdev_19_24_3017__4.pdf [file genesdev_19_24_3017__4.pdf]

Supplemental Figure 5 (Kiburz)

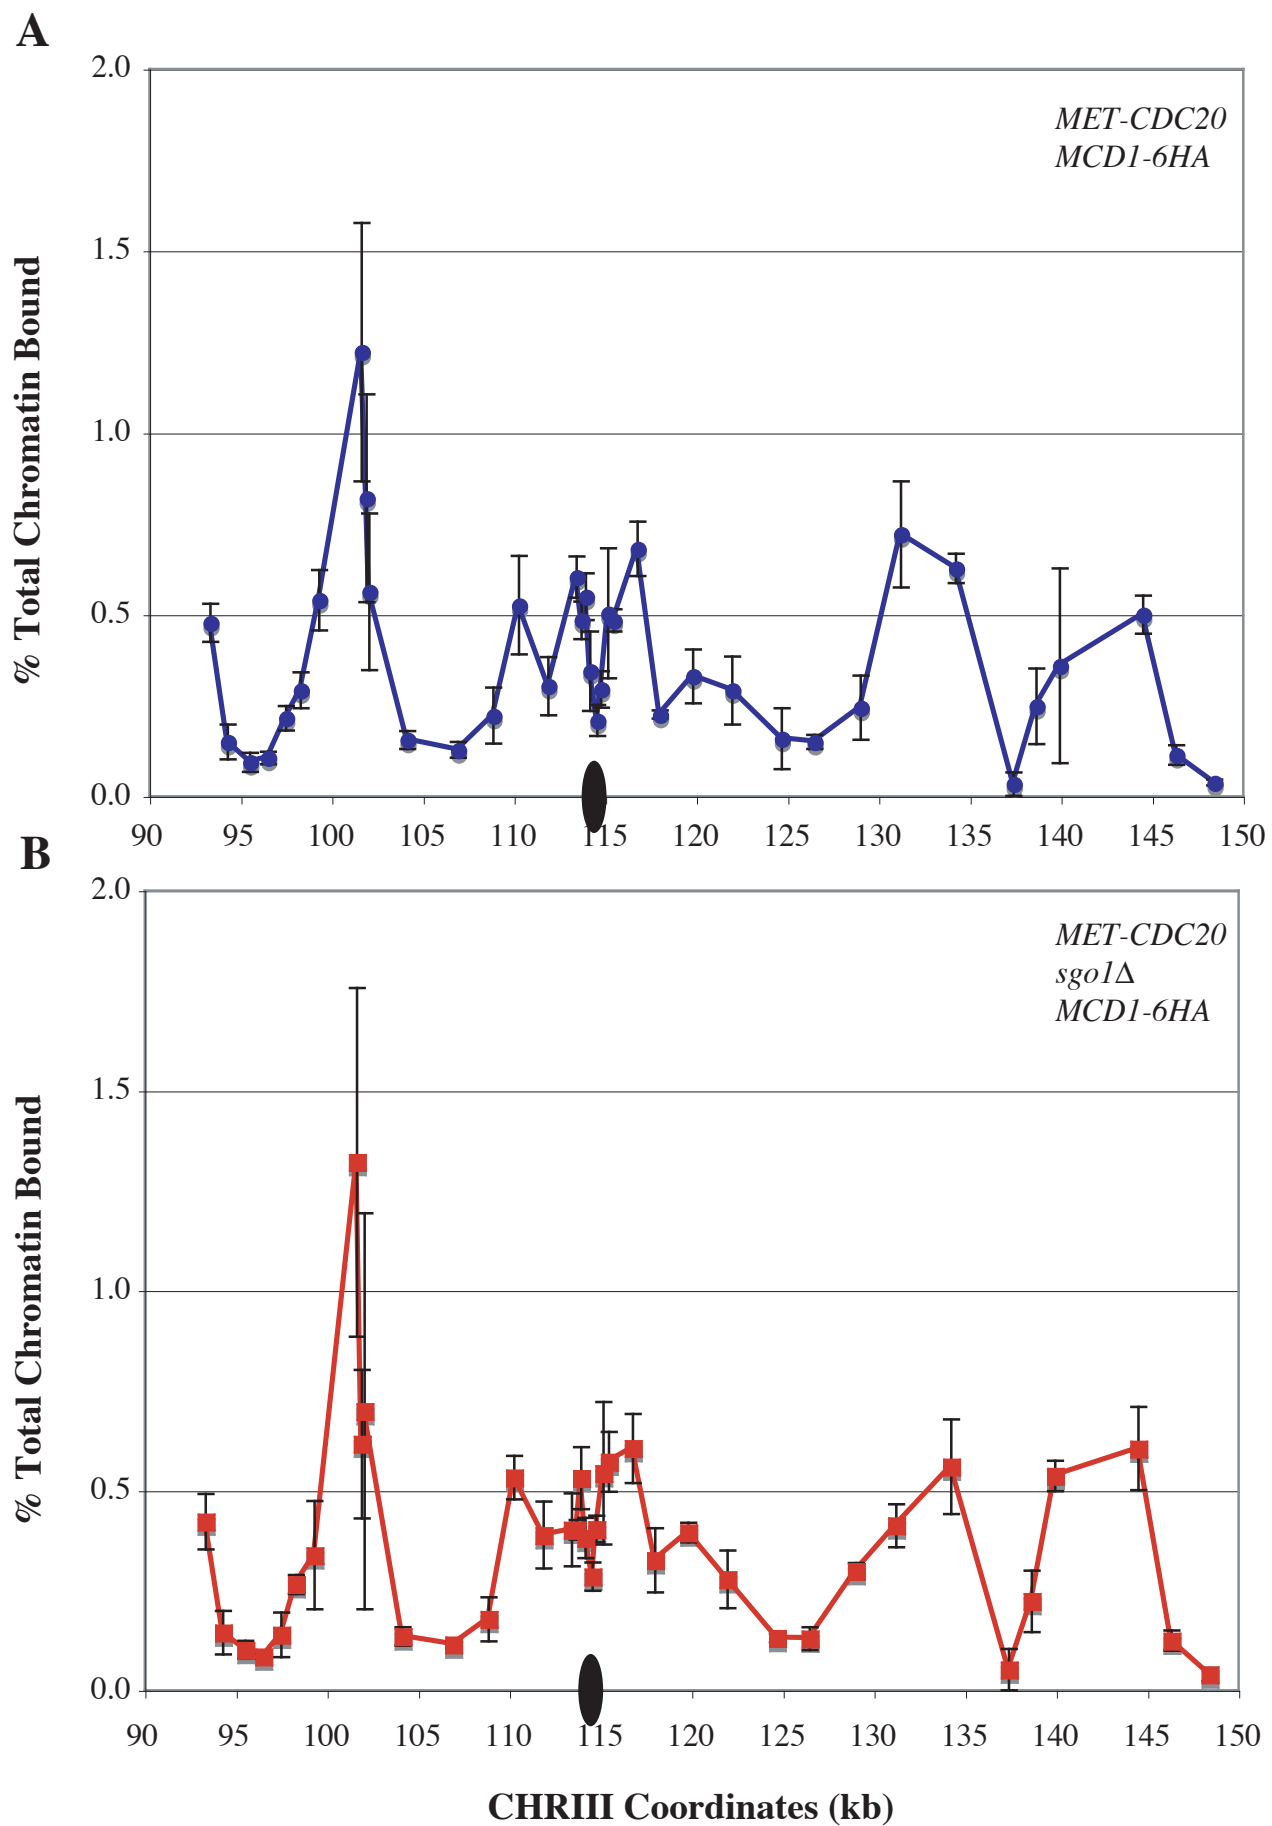

Supplement: genesdev_19_24_3017__5.pdf [file genesdev_19_24_3017__5.pdf]

# Supplemental Figure 6 (Kiburz)

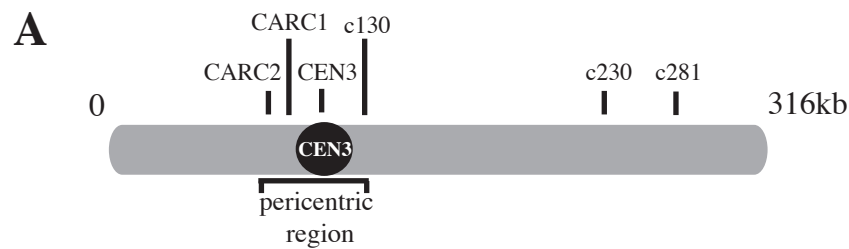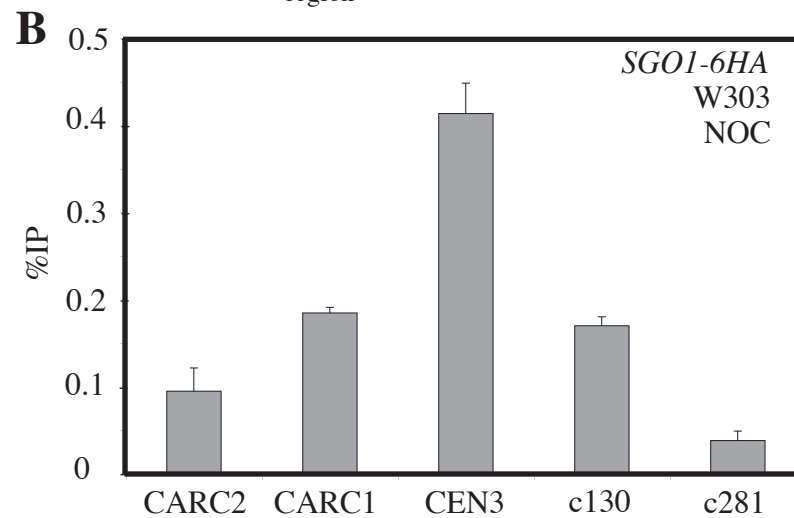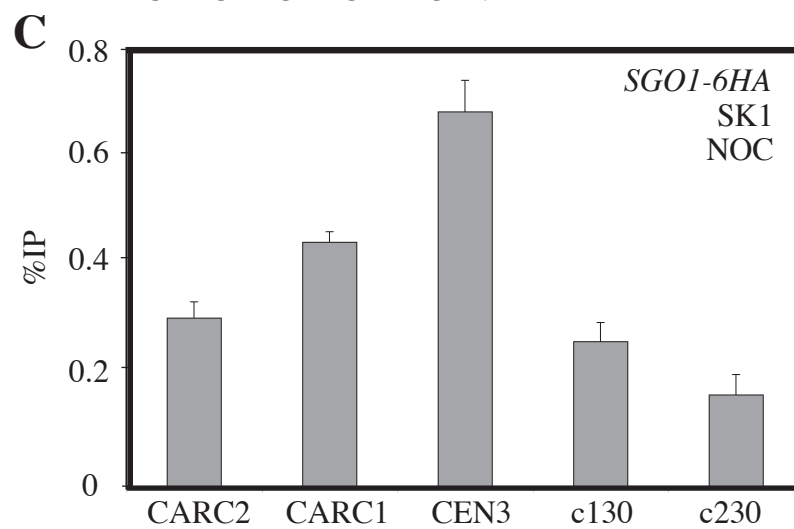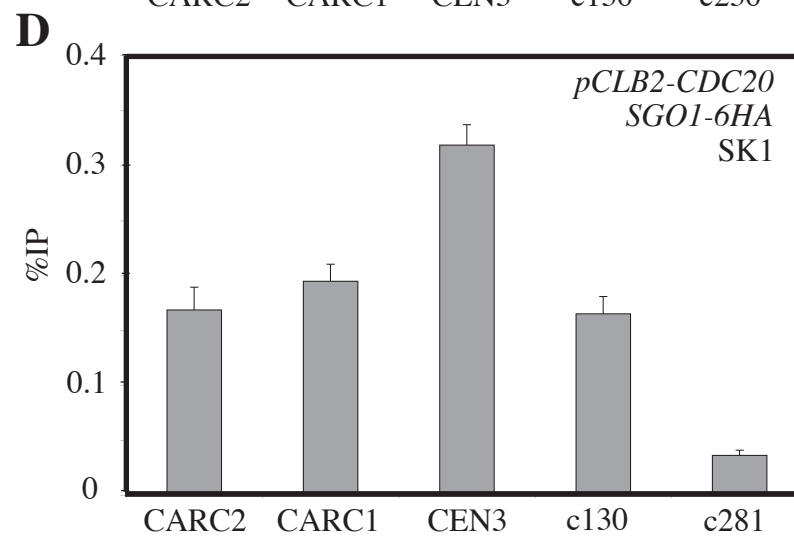

Supplement: genesdev_19_24_3017__6.pdf [file genesdev_19_24_3017__6.pdf]

# Supplemental Figure 7 (Kiburz)

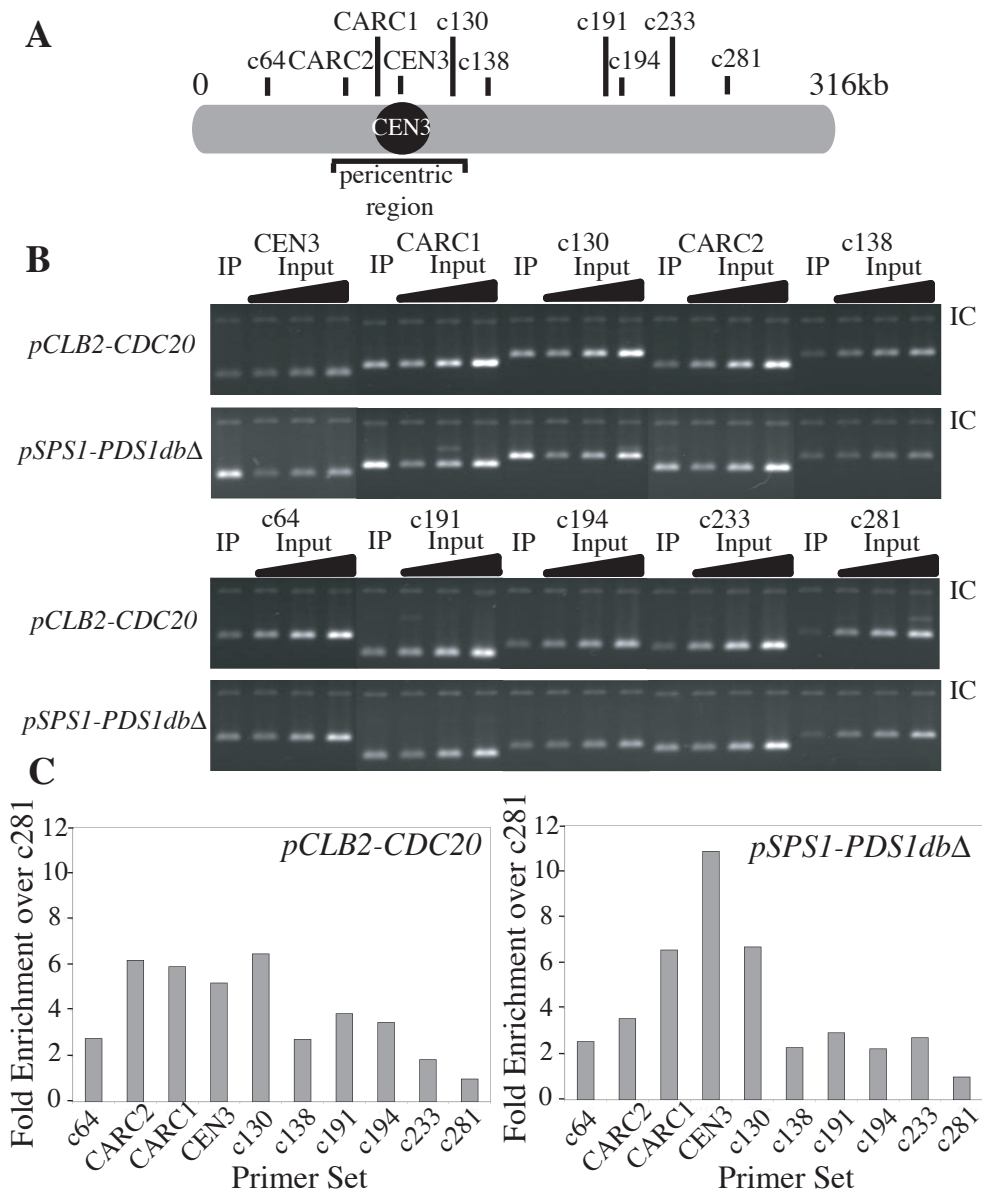

Supplement: genesdev_19_24_3017__7.pdf [file genesdev_19_24_3017__7.pdf]

Supplemental Figure 8 (Kiburz)

5 hr  
10 hr

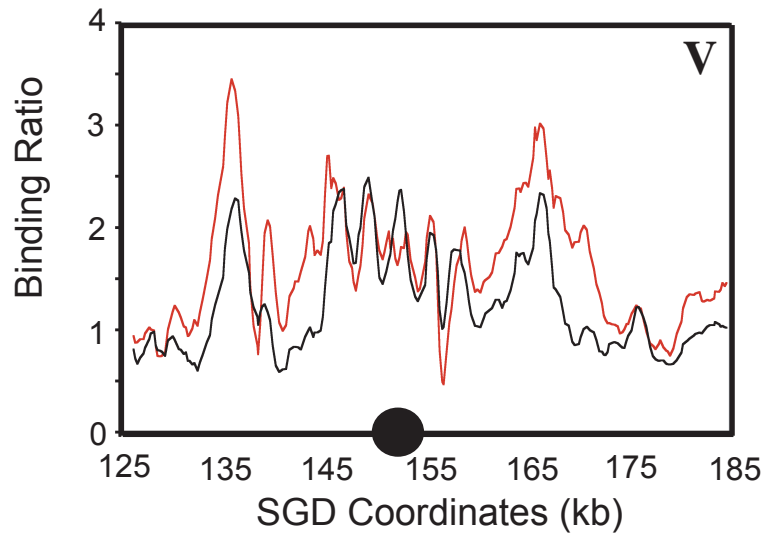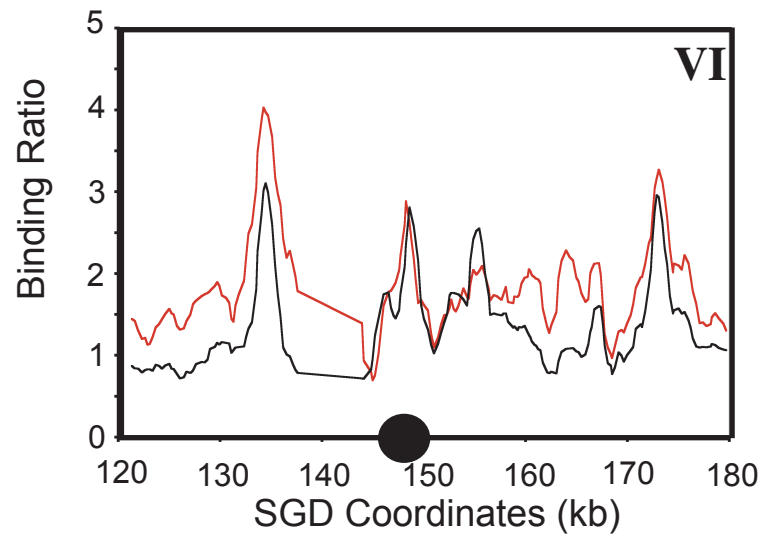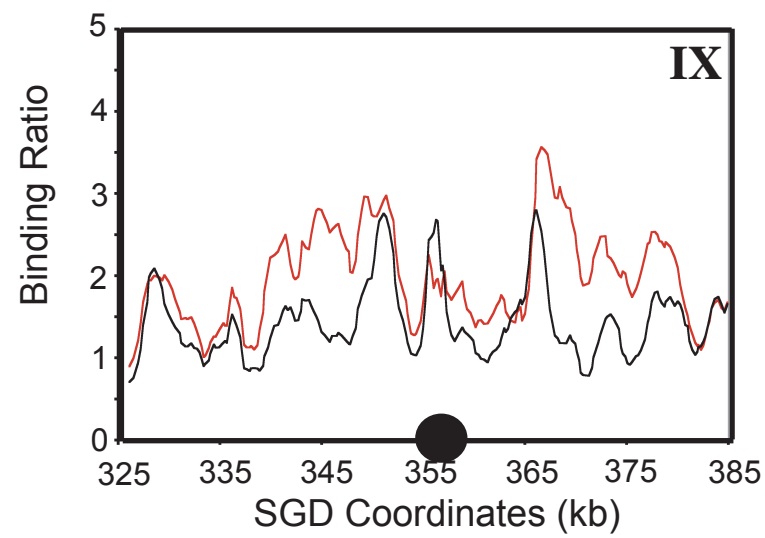

Supplement: genesdev_19_24_3017__8.pdf [file genesdev_19_24_3017__8.pdf]
